# Supplementary material
Source: bioRxiv or medRxiv preprint supplement (https://www.biorxiv.org/highwire/filestream/44946/field_highwire_adjunct_files/2/151126-11.pdf)

**A**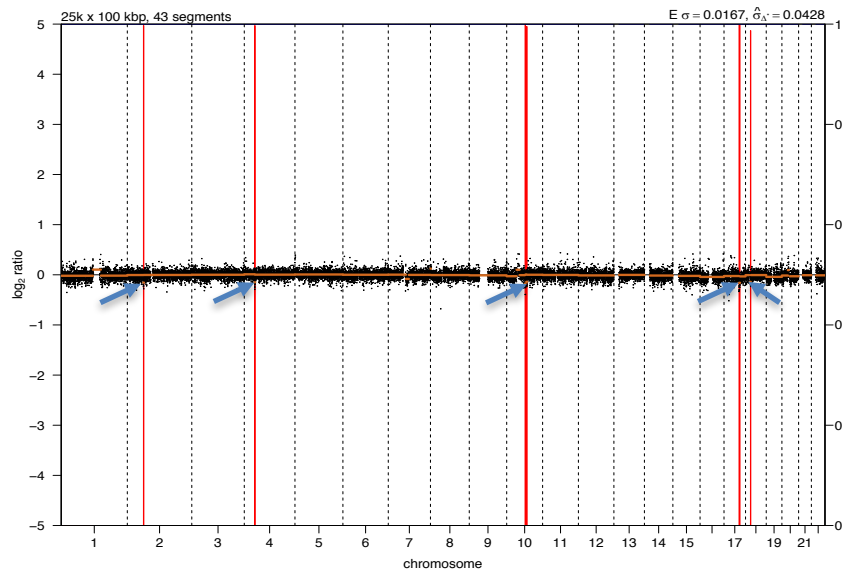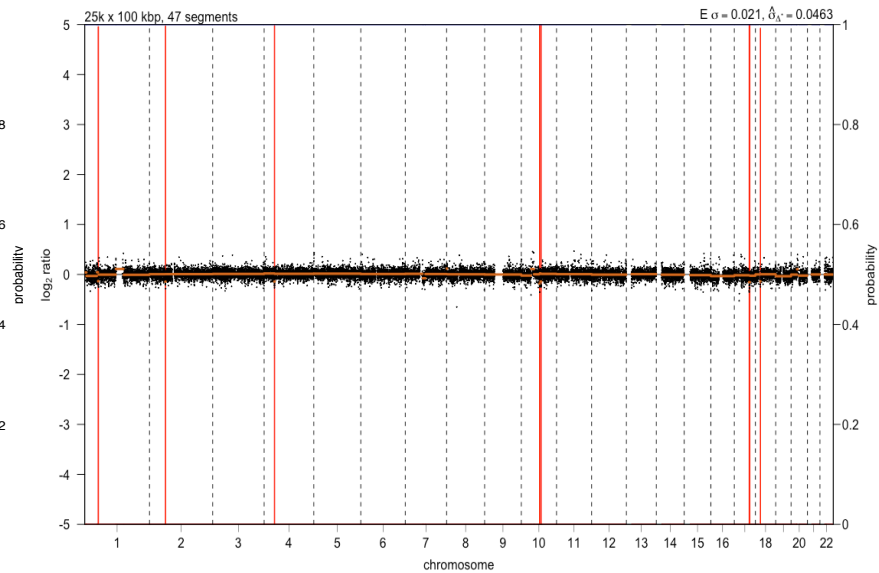**B**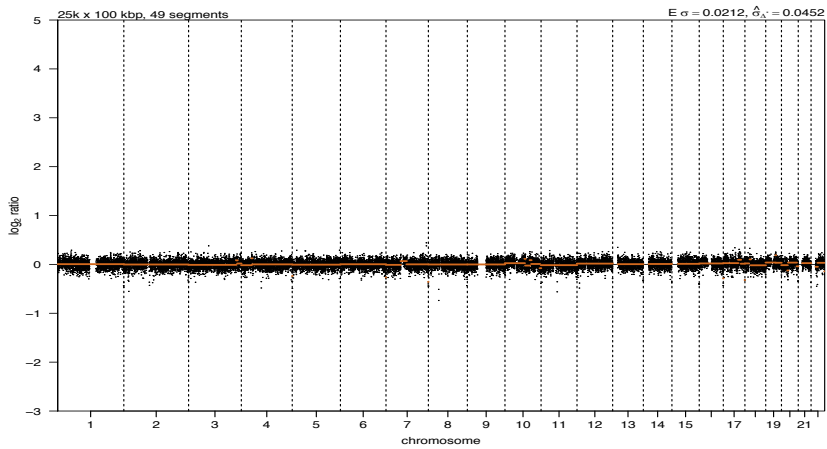

Supplement: Supplementary file [file 151126-11.pdf]
